# Supplementary material
Source: Springer Nature journal article supplement (https://www.springermedizin.de/resource/supplementary/13023_2013_628_MOESM7_ESM.pdf/9642548)

A

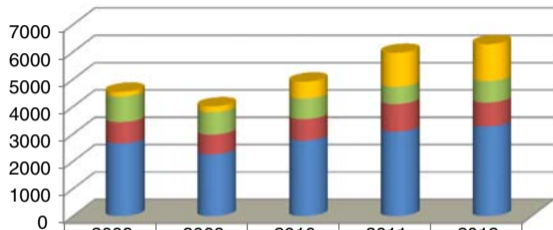

|            |      |      |      |      |      |
|------------|------|------|------|------|------|
| Others     | 179  | 214  | 612  | 1244 | 1348 |
| Tissues    | 934  | 817  | 752  | 627  | 785  |
| Cell lines | 778  | 722  | 788  | 1013 | 879  |
| DNA/RNA    | 2653 | 2258 | 2759 | 3082 | 3271 |

B

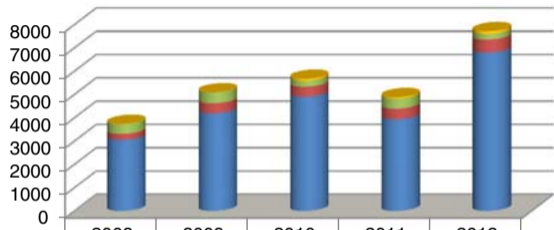

|            |      |      |      |      |      |
|------------|------|------|------|------|------|
| Others     | 12   | 12   | 83   | 65   | 119  |
| Tissues    | 417  | 456  | 256  | 427  | 240  |
| Cell lines | 259  | 437  | 434  | 458  | 570  |
| DNA/RNA    | 3043 | 4185 | 4896 | 3932 | 6785 |

Supplement: MOESM7 [file 9642548]
